# Supplementary material
Source: PubMed Central journal article supplement (PMC9361741)
Supplement: NIHMS1824739-supplement-1.pdf [file NIHMS1824739-supplement-1.pdf]

**Supplementary Table 1. Mean Cognitive Domain T-Scores in BRINK CKD Cohort at Baseline**

| <b>CF Domain scores<br/>Mean (SD)</b>           | <b>Component T-Scores</b>                | <b>CKD<br/>(eGFR &lt;60)<br/>N = 436<sup>1</sup></b> | <b>Mild-Mod CKD<br/>(eGFR 30 - &lt;60)<br/>N = 278<sup>1</sup></b> | <b>Advanced CKD<br/>(eGFR &lt;30)<br/>N = 158<sup>1</sup></b> | <b>p-value<br/>for two-sample<br/>t-test<sup>2</sup></b> |
|-------------------------------------------------|------------------------------------------|------------------------------------------------------|--------------------------------------------------------------------|---------------------------------------------------------------|----------------------------------------------------------|
| <b>Memory</b>                                   | <b>HVLT delayed and<br/>BVMT delayed</b> | <b>44.5 (10.8)</b>                                   | <b>46.6 (9.9)</b>                                                  | <b>40.8 (11.2)</b>                                            | <b>P &lt; 0.001</b>                                      |
| <b>Executive function<br/>/processing speed</b> | <b>SDMT,<br/>CTT-1, CTT-2</b>            | <b>46.8 (9.8)</b>                                    | <b>48.1 (9.2)</b>                                                  | <b>44.4 (10.3)</b>                                            | <b>P &lt; 0.001</b>                                      |
| <b>Language</b>                                 | <b>COWAT,<br/>Animals (from 3MSE)</b>    | <b>45.2 (8.4)</b>                                    | <b>45.7 (8.4)</b>                                                  | <b>44.4 (8.3)</b>                                             | <b>P = 0.110</b>                                         |

<sup>1</sup>N for memory domain scores = 432 for all CKD, 275 for Mild-Mod CKD, 157 for Advanced CKD; <sup>2</sup>t-test p-value for mean domain T-score difference between Mild-Mod CKD and Advanced CKD
